# Supplementary material for: Discovery of Lake Sinai virus and an unusual strain of acute bee paralysis virus in West African apiaries
Source: Springer Nature journal article supplement (doi:10.1007/s13592-015-0372-z), 2015-07-08
Supplement: MOESM1 [file 13592_2015_372_MOESM1_ESM.pdf]

**Discovery of Lake Sinai virus and an unusual strain of Acute bee  
paralysis virus in West African apiaries**

Felicien Amakpe, Lina De Smet, Marleen Brunain, Jorgen Ravoet, Frans J. Jacobs, Wim  
Reybroeck, Brice Sinsin, Dirk C. de Graaf\*

\* Corresponding author: D.C. de Graaf, Dirk.deGraaf@UGent.be

Laboratory of Molecular Entomology and Bee Pathology, Krijgslaan 281 S2, Ghent University, Ghent,  
Belgium

**Table S1** Pesticides that are in use in the Republic of Benin as accepted by the National Regulation on Agricultural Pesticides. Market names and active matters are given. The dates of adoption and expiration cover the research period.

| N° | Trade Name         | Active matter                                                  | Date adoption | Date expiration | Pesticide type             |
|----|--------------------|----------------------------------------------------------------|---------------|-----------------|----------------------------|
| 1  | Kalach 360 SI      | Glyphosate 360 g/l                                             | 30/08/2011    | 09/08/2021      | Systemic herbicide         |
| 2  | Akizon 4sc         | Nicosulfuron 40 g/l                                            | 11/03/2011    | 10/03/2021      | Rice herbicide             |
| 3  | Garil              | Triclopyr 72 g/l<br>Propanil 360 g/l                           | 16/05/2008    | 15/05/2018      | Rice herbicide             |
| 4  | Topstar 400sc      | Oxadiargyl 400 g/l                                             | 27/04/2009    | 26/04/2019      | Rice herbicide             |
| 5  | Gallant Super      | Haloxypol méthyle ester 104 g/l                                | 27/04/2009    | 26/04/2019      | Cotton herbicide           |
| 6  | Callifor G         | Glyphosate 60 g/l<br>Fluometuron 250 g/l<br>Prometrine 250 g/l | 27/04/2009    | 26/04/2019      | Cotton herbicide           |
| 7  | Cottonex P Sc      | Fluométuren 250 g/l<br>Prométryne 250 g/l                      | 16/04/2010    | 15/04/2020      | Cotton herbicide           |
| 8  | Cottonex Pg 560 Sc | Fluométuren 250 g/l<br>Prométryne 250 g/l<br>Glyphosate 60 g/l | 16/04/2010    | 15/04/2020      | Cotton herbicide           |
| 9  | Cotogard Sc        | Fluometuron 250 g/l<br>Prometryn 250 g/l                       | 16/04/2010    | 15/04/2020      | Cotton herbicide           |
| 10 | Malik 108 Ec       | Haloxypol-r-methyl 108 g/l                                     | 16/04/2010    | 15/04/2020      | Cotton herbicide           |
| 11 | Finish 360 SI      | Glyphosate acide 360 g/l                                       | 24/01/2012    | 23/01/2022      | Systemic herbicide         |
| 12 | Glyfos 360 SI      | Glyphosate acide 360 g/l                                       | 24/01/2012    | 23/01/2022      | Systemic herbicide         |
| 13 | Mamba 360 SI       | Glyphosate acide 360 g/l                                       | 24/01/2012    | 23/01/2022      | Systemic herbicide         |
| 14 | Herbalm 720 SI     | 2,4 D 72%                                                      | 04/12/2012    | 03/12/2017      | Cereals and palm herbicide |

|    |                      |                                                                   |            |            |                            |
|----|----------------------|-------------------------------------------------------------------|------------|------------|----------------------------|
| 15 | Glyphalm 720 Wg      | Glyphosate 720 g/kg                                               | 04/12/2012 | 03/12/2017 | Systemic herbicide         |
| 16 | Glyphalm 360 Sl      | Glyphosate acide 360 g/l                                          | 04/12/2012 | 03/12/2017 | Systemic herbicide         |
| 17 | Glycel 41%           | Glyphosate acide 410 g/l                                          | 04/12/2012 | 03/12/2017 | Herbicide                  |
| 18 | Terbulor 500 Ec      | Terbutryn 167 g/l<br>Métolachlore 333 g/l                         | 04/12/2012 | 03/12/2017 | Cotton and maize herbicide |
| 19 | Defcal 8 Ec          | Pyraflufen ethyl 8 g/l                                            | 04/12/2012 | 03/12/2017 | Herbicide                  |
| 20 | Select 120 Ec        | Cléthodim 120 g/l                                                 | 04/12/2012 | 03/12/2017 | Cotton herbicide           |
| 21 | Triprou**            | Triclopyr 72 g/l<br>Propanil 360 g/l                              | 18/11/2013 | 17/11/2018 | Herbicide                  |
| 22 | Glyphogan 360 Sl     | Glyphosate 360 g/l                                                | 08/03/2005 | 07/03/2015 | Herbicide                  |
| 23 | Dursban B 200/18 Ec  | Cyfluthrine 18 g/l<br>Chlorpyriphos ethyl 200 g/l                 | 24/01/2012 | 23/01/2022 | Cotton herbicide           |
| 24 | Kinikini             | Cyfluthrine 9,6 g/l<br>Malathion 400 g/l                          | 08/03/2005 | 07/03/2015 | Systemic insecticide       |
| 25 | Trialm 400 Ec        | Triazophos 400 g/l                                                | 08/03/2005 | 07/03/2015 | Cotton insecticide         |
| 26 | Cypalm 350 Ec        | Cyperméthrine 350 g/l                                             | 08/03/2005 | 07/03/2015 | Cotton insecticide         |
| 27 | Decis 10,75 Ec       | Deltaméthrine 10,75 g/l                                           | 18/08/2006 | 17/08/2016 | Insecticide                |
| 28 | Decis 25 Ec          | Deltaméthrine 25 g/l                                              | 18/08/2006 | 17/08/2016 | Insecticide                |
| 29 | Sherphos 180 Ec      | Cyperméthrine 30 g/l<br>Triazophos 150 g/l                        | 18/08/2006 | 17/08/2016 | Acaricide-insecticide      |
| 30 | Sherphos 280 Ec      | Cyperméthrine 30 g/l<br>Triazophos 250 g/l                        | 18/08/2006 | 17/08/2016 | Acaricide-insecticide      |
| 31 | Sherpa 35 Ec         | Cyperméthrine 35 g/l                                              | 18/08/2006 | 17/08/2016 | Insecticide                |
| 32 | Conquest Plus 388 Ec | Acétamipride 16 g/l<br>Cyperméthrine 72 g/l<br>Triazophos 300 g/l | 18/08/2006 | 17/08/2016 | Insecticide                |
| 33 | Laser 480 Sc         | Spinosad 480 g/l                                                  | 03/01/2008 | 02/01/2018 | Cotton insecticide         |

|    |                    |                                                     |            |            |                          |
|----|--------------------|-----------------------------------------------------|------------|------------|--------------------------|
| 34 | Dursban 4 E        | Chlorpyriphos éthyl 480 g/l                         | 03/01/2008 | 02/01/2018 | Insecticide              |
| 35 | Calfos 500 Ec      | Profénofos 500 g/l                                  | 28/08/2008 | 27/08/2018 | Acaricide-insecticide    |
| 36 | Alphacal P218 Ec   | Alphacyperméthrine 18 g/l<br>Profénofos 200 g/l     | 28/08/2008 | 27/08/2018 | Acaricide-insecticide    |
| 37 | Cypercal P 330 Ec  | Cyperméthrine 30 g/l<br>Profénofos 300 g/l          | 28/08/2008 | 27/08/2018 | Acaricide-insecticide    |
| 38 | Lambdacal P 315 Ec | Lambdacyhalothrine 15 g/l<br>Profenofos 300 g/l     | 27/04/2009 | 26/04/2019 | Acaricide-insecticide    |
| 39 | Lambdacal P 215 Ec | Lambdacyhalothrine 15 g/l<br>Profenofos 200 g/l     | 27/04/2009 | 26/04/2019 | Insecticide              |
| 40 | Laser 480 Sc       | Spinosad 480 g/l                                    | 27/04/2009 | 26/04/2019 | Insecticide              |
| 41 | Spintor Poudre     | Spinosad 1.25 g/kg                                  | 27/04/2009 | 26/04/2019 | Post harvest insecticide |
| 42 | Nurelle D 36/200   | Cyperméthrine 36 g/l<br>Chlorpyriphos ethyl 200 g/l | 27/04/2009 | 26/04/2019 | Cotton insecticide       |
| 43 | Nurelle D 35/300   | Cyperméthrine 35 g/l<br>Chlorpyriphos ethyl 300 g/l | 27/04/2009 | 26/04/2019 | Cotton insecticide       |
| 44 | Dursban B 318      | Cyfluthrine 18 g/l<br>Chlorpyriphos ethyl 300 g/l   | 27/04/2009 | 26/04/2019 | Cotton insecticide       |
| 45 | Chango 122 Se      | Indoxacarbe 50 g/l<br>Cypermethrine 72 g/l          | 09/06/2009 | 08/06/2019 | Cotton insecticide       |
| 46 | Emir 88 Ec         | Cypermethrine 72 g/l<br>Acetamipride 16,6 g/l       | 16/04/2010 | 15/04/2020 | Cotton insecticide       |
| 47 | Calife 500 Ec      | Profénofos 500 g/l                                  | 16/04/2010 | 15/04/2020 | Cotton insecticide       |
| 48 | Thunder 145 Q-Teq  | Betacyfluthrine 45 g/l<br>Imidacioprid 100 g/l      | 17/08/2010 | 22/08/2020 | Aphicide-insecticide     |
| 49 | Pacha 25 Ec        | Acetamipride 10 g/l<br>Lambdacyhalothrine 15 g/l    | 17/07/2011 | 16/07/2021 | Insecticide              |
| 50 | Lambdacal P 630 Ec | Lambdacyhalothrine 30 g/l<br>Profénofos 600 g/l     | 17/07/2011 | 16/07/2021 | Cotton insecticide       |

|    |                      |                                                         |            |            |                          |
|----|----------------------|---------------------------------------------------------|------------|------------|--------------------------|
| 51 | Lambdacal P 645 Ec   | Lambdacyhalothrine 45 g/l<br>Profénofos 600 g/l         | 17/07/2011 | 16/07/2021 | Cotton insecticide       |
| 52 | Marshall 35 Ds       | Carbosulfan 350g/kg                                     | 16/10/2010 | 15/10/2020 | Post harvest insecticide |
| 53 | Conquest 88 Ec       | Acetamiprid 16g/l<br>Cyperméthrine 72g/l                | 16/10/2010 | 15/10/2020 | Cotton insecticide       |
| 54 | Pyrinex Quick 212 Ec | Deltamethrine 12 g/l<br>Chlorpyriphos ethyl 200 g/l     | 17/08/2010 | 16/08/2020 | Cotton insecticide       |
| 55 | Tihan 175 O-Teq      | Flubendiamide 100 g/l<br>Spirotetramate 75 g/l          | 24/01/2012 | 23/01/2022 | Cotton insecticide       |
| 56 | Ato Ibi 01           | Betacypermethrine 18 g/l<br>Chlorpyriphos-Ethyl 300 g/l | 24/01/2012 | 23/01/2022 | Cotton insecticide       |
| 57 | Conquest C176 Ec     | Acétamipride 32 g/l<br>Cyperméthrine 144 g/l            | 23/01/2012 | 22/01/2022 | Insecticide              |
| 58 | Capt 88 Ec           | Acétamipride 16 g/l<br>Cyperméthrine 72 g/l             | 04/12/2012 | 03/12/2017 | Cotton insecticide       |
| 59 | Fanga 500 Ec         | Profénofos 500 g/l                                      | 04/12/2012 | 03/12/2017 | Cotton insecticide       |
| 60 | Cotalm P 218 Ec      | Lambdacyhalothrine 18 g/l<br>Profénofos 200 g/l         | 04/12/2012 | 03/12/2017 | Cotton insecticide       |
| 61 | Cotalm P 310 Ec      | Lambdacyhalothrine 10 g/l<br>Profénofos 300 g/l         | 04/12/2012 | 03/12/2017 | Cotton insecticide       |
| 62 | Cyflutralm P 218 Ec  | Cyfluthrine 18 g/l<br>Profénofos 200 g/l                | 04/12/2012 | 03/12/2017 | Cotton insecticide       |
| 63 | Cyflutralm P 318 Ec  | Cyfluthrine 18 g/l<br>Profénofos 300 g/l                | 04/12/2012 | 03/12/2017 | Cotton insecticide       |
| 64 | Steward 150 Ec       | Indoxacarbe 150g/l                                      | 04/12/2012 | 03/12/2017 | Cotton insecticide       |
