# Supplementary material for: Discovery of Lake Sinai virus and an unusual strain of acute bee paralysis virus in West African apiaries
Source: Springer Nature journal article supplement (doi:10.1007/s13592-015-0372-z), 2015-07-08
Supplement: MOESM2 [file 13592_2015_372_MOESM2_ESM.pdf]

**Discovery of Lake Sinai virus and an unusual strain of Acute bee  
paralysis virus in West African apiaries**

Felicien Amakpe, Lina De Smet, Marleen Brunain, Jorgen Ravoet, Frans J. Jacobs, Wim  
Reybroeck, Brice Sinsin, Dirk C. de Graaf\*

\* Corresponding author: D.C. de Graaf, Dirk.deGraaf@UGent.be

Laboratory of Molecular Entomology and Bee Pathology, Krijgslaan 281 S2, Ghent University, Ghent,  
Belgium

**Table S2** *Varroa destructor* mites and pest species found in the nationwide health screen of

Benin. 0 = not found; 1 = found

| Sample code | <i>Varroa</i><br>(on workers) | <i>Varroa</i><br>(on drones) | Small hive<br>beetle | Large hive<br>beetle |
|-------------|-------------------------------|------------------------------|----------------------|----------------------|
| 1           | 1                             | 1                            | 1                    | 0                    |
| 2           | 0                             | 0                            | 1                    | 1                    |
| 3           | 0                             | 0                            | 0                    | 0                    |
| 4           | 1                             | 1                            | 1                    | 1                    |
| 5           | 1                             | 1                            | 1                    | 1                    |
| 6           | 1                             | 1                            | 0                    | 1                    |
| 7           | 0                             | 0                            | 1                    | 0                    |
| 8           | 1                             | 1                            | 1                    | 1                    |
| 9           | 0                             | 0                            | 1                    | 0                    |
| 10          | 0                             | 0                            | 0                    | 0                    |
| 11          | 0                             | 0                            | 1                    | 0                    |
| 12          | 0                             | 0                            | 1                    | 1                    |
| 13          | 1                             | 0                            | 1                    | 0                    |
| 14          | 1                             | 1                            | 0                    | 0                    |
| 15          | 0                             | 0                            | 1                    | 0                    |
| 16          | 1                             | 1                            | 1                    | 0                    |
| 17          | 0                             | 0                            | 1                    | 0                    |
| 18          | 1                             | 1                            | 1                    | 0                    |
| 19          | 1                             | 1                            | 1                    | 0                    |
| 20          | 0                             | 0                            | 1                    | 0                    |
| 21          | 0                             | 0                            | 1                    | 0                    |
| 22          | 1                             | 1                            | 1                    | 0                    |
| 23          | 0                             | 0                            | 1                    | 0                    |
| 24          | 1                             | 1                            | 1                    | 0                    |
| 25          | 1                             | 0                            | 1                    | 0                    |
| 26          | 1                             | 1                            | 1                    | 0                    |
| 27          | 0                             | 0                            | 0                    | 0                    |
| 28          | 0                             | 0                            | 1                    | 0                    |
| 29          | 0                             | 0                            | 1                    | 0                    |
| 30          | 0                             | 0                            | 1                    | 0                    |
| 31          | 0                             | 0                            | 1                    | 0                    |
| 32          | 0                             | 0                            | 1                    | 0                    |
| 33          | 1                             | 0                            | 1                    | 0                    |
| 34          | 1                             | 1                            | 1                    | 0                    |
| 35          | 1                             | 1                            | 1                    | 0                    |
| 36          | 1                             | 1                            | 1                    | 0                    |
| 37          | 1                             | 1                            | 1                    | 0                    |
| 38          | 0                             | 1                            | 1                    | 0                    |
| 39          | 0                             | 1                            | 1                    | 0                    |
| 40          | 0                             | 0                            | 1                    | 0                    |
| 41          | 1                             | 1                            | 1                    | 0                    |
| 42          | 1                             | 1                            | 1                    | 0                    |
| 43          | 1                             | 1                            | 1                    | 0                    |
| 44          | 1                             | 1                            | 1                    | 0                    |

|    |   |   |   |   |
|----|---|---|---|---|
| 45 | 1 | 1 | 0 | 0 |
| 46 | 0 | 0 | 1 | 0 |
| 47 | 0 | 0 | 1 | 0 |
| 48 | 0 | 0 | 0 | 0 |
| 49 | 0 | 0 | 1 | 0 |
| 50 | 0 | 0 | 1 | 0 |
| 51 | 1 | 1 | 0 | 0 |
| 52 | 0 | 0 | 1 | 0 |
| 53 | 0 | 0 | 1 | 0 |
| 54 | 0 | 0 | 1 | 0 |
| 55 | 0 | 0 | 1 | 0 |
| 56 | 0 | 1 | 1 | 0 |
| 57 | 0 | 1 | 1 | 0 |
| 58 | 0 | 0 | 1 | 0 |
| 59 | 0 | 1 | 1 | 0 |
| 60 | 0 | 0 | 1 | 0 |
| 61 | 0 | 1 | 1 | 1 |
| 62 | 0 | 0 | 0 | 0 |
| 63 | 1 | 0 | 1 | 0 |
| 64 | 1 | 0 | 1 | 0 |
| 65 | 0 | 0 | 0 | 0 |
| 66 | 0 | 0 | 1 | 0 |
| 67 | 0 | 0 | 1 | 0 |
| 68 | 1 | 1 | 1 | 0 |
| 69 | 1 | 1 | 1 | 0 |
| 70 | 0 | 0 | 1 | 0 |
| 71 | 0 | 0 | 1 | 0 |
| 72 | 0 | 0 | 1 | 0 |
| 73 | 1 | 1 | 1 | 0 |
| 74 | 0 | 0 | 1 | 0 |
| 75 | 0 | 0 | 1 | 0 |
| 76 | 0 | 0 | 1 | 0 |
| 77 | 1 | 1 | 1 | 0 |
| 78 | 0 | 0 | 1 | 0 |
| 79 | 0 | 1 | 1 | 0 |
| 80 | 1 | 1 | 1 | 0 |
| 81 | 1 | 0 | 1 | 0 |
| 82 | 0 | 0 | 1 | 1 |
| 83 | 0 | 0 | 1 | 0 |
| 84 | 0 | 0 | 1 | 0 |
| 85 | 1 | 1 | 1 | 1 |
| 86 | 1 | 1 | 1 | 0 |
| 87 | 0 | 0 | 1 | 0 |
| 88 | 0 | 0 | 1 | 0 |
| 89 | 0 | 0 | 1 | 0 |
| 90 | 0 | 0 | 1 | 0 |
| 91 | 0 | 0 | 1 | 0 |
| 92 | 0 | 0 | 1 | 0 |
| 93 | 0 | 0 | 1 | 0 |
| 94 | 0 | 0 | 1 | 0 |

|     |   |   |   |   |
|-----|---|---|---|---|
| 95  | 1 | 1 | 1 | 0 |
| 96  | 1 | 1 | 1 | 0 |
| 97  | 1 | 1 | 1 | 1 |
| 98  | 0 | 0 | 0 | 1 |
| 99  | 1 | 1 | 1 | 1 |
| 100 | 1 | 1 | 1 | 1 |
| 101 | 1 | 1 | 1 | 0 |
